# Supplementary material for: Isolation, Characterization and Whole Genome Analysis of an Avian Pathogenic Escherichia coli Phage vB_EcoS_GN06
Source: MDPI journal article supplement (doi:10.3390/vetsci9120675), 2022-12-05
Supplement: s1 [file s1]

**Table S1. ORFs description.**

| CD<br>S | start | stop  | identity | length<br>(aa) | function                                                                    | e-value | accession<br>number |
|---------|-------|-------|----------|----------------|-----------------------------------------------------------------------------|---------|---------------------|
| 1       | 1537  | 2427  | 99.32%   | 296            | hypothetical protein [Salmonella phage SP76]                                | 0.0     | QPI16080.1          |
| 2       | 2427  | 3041  | 100.00%  | 61             | hypothetical protein [Escherichia phage vB_EcoS_AKfV33]                     | 1.E-30  | YP_006382319.1      |
| 3       | 3041  | 3226  | 99.32%   | 146            | hypothetical protein [Salmonella enterica subsp. enterica serovar Derby]    | 5.E-106 | ECJ4201711.1        |
| 4       | 3226  | 3666  | 98.04%   | 204            | hypothetical protein [Salmonella enterica subsp. enterica serovar Bareilly] | 4.E-149 | YP_004306501.1      |
| 5       | 3668  | 3871  | 100.00%  | 67             | hypothetical protein SPC35_0022 [Salmonella virus SPC35]                    | 2.E-41  | YP_004306505.1      |
| 6       | 3926  | 4264  | 99.11%   | 112            | hypothetical protein HOT55_gp027 [Salmonella phage SP3]                     | 1.E-72  | YP_009804458.1      |
| 7       | 4245  | 4706  | 99.35%   | 153            | hypothetical protein A318_gp026 [Escherichia phage vB_EcoS_AKfV33]          | 4.E-110 | YP_006382325.1      |
| 8       | 4703  | 4903  | 98.48%   | 66             | hypothetical protein SPC35_0025 [Salmonella virus SPC35]                    | 5.E-38  | YP_004306508.1      |
| 9       | 5003  | 5329  | 99.07%   | 108            | hypothetical protein [Salmonella phage vB_SalS_ABTNLsp4]                    | 1.E-71  | QPI13133.1          |
| 10      | 5319  | 5564  | 100.00%  | 81             | putative membrane protein [Salmonella phage bux]                            | 7.E-50  | QIQ61667.1          |
| 11      | 5561  | 5842  | 100.00%  | 93             | hypothetical protein A318_gp030 [Escherichia phage vB_EcoS_AKfV33]          | 1.E-56  | YP_006382329.1      |
| 12      | 5842  | 6003  | 96.23%   | 53             | hypothetical protein SPC35_0029 [Salmonella virus SPC35]                    | 2.E-27  | YP_004306512.1      |
| 13      | 6003  | 6254  | 100.00%  | 83             | hypothetical protein SPC35_0030 [Salmonella virus SPC35]                    | 1.E-51  | YP_004306513.1      |
| 14      | 6333  | 6764  | 100.00%  | 143            | hypothetical protein A318_gp032 [Escherichia phage vB_EcoS_AKfV33]          | 9.E-101 | YP_006382331.1      |
| 15      | 6817  | 6939  | 97.50%   | 40             | hypothetical protein HOT55_gp036 [Salmonella phage SP3]                     | 4.E-15  | YP_009804467.1      |
| 16      | 6932  | 7453  | 95.95%   | 173            | serine/threonine protein phosphatase [Shigella sonnei]                      | 1.E-121 | EHE3968337.1        |
| 17      | 7453  | 8316  | 97.91%   | 287            | putative serine/threonine protein phosphatase [Salmonella phage L6jm]       | 0.0     | YP_009856432.1      |
| 18      | 8319  | 8564  | 98.77%   | 81             | hypothetical protein [Salmonella enterica subsp. enterica serovar Derby]    | 1.E-50  | ECJ4201699.1        |
| 19      | 8662  | 8952  | 100.00%  | 96             | putative thioredoxin [Escherichia virus T5]                                 | 1.E-64  | YP_006865.1         |
| 20      | 8945  | 9376  | 100.00%  | 143            | hypothetical protein SPC35_0037 [Salmonella virus SPC35]                    | 7.E-99  | YP_004306520.1      |
| 21      | 9452  | 9868  | 100.00%  | 138            | hypothetical protein FG39_gp040 [Escherichia phage vB_EcoS_FFH_1]           | 5.E-94  | YP_009031661.1      |
| 22      | 9946  | 10359 | 100.00%  | 137            | lysozyme [Escherichia phage vB_EcoS_AKfV33]                                 | 3.E-96  | YP_006382340.1      |
| 23      | 10356 | 11012 | 100.00%  | 218            | putative holin [Escherichia phage vB_EcoS_FFH_1]                            | 1.E-158 | YP_009031663.1      |
| 24      | 11184 | 11768 | 99.48%   | 194            | ATP-dependent Clp protease proteolytic subunit [Salmonella phage SP01]      | 2.E-144 | YP_009792580.1      |
| 25      | 11781 | 12533 | 100.00%  | 250            | deoxynucleoside-5'-monophosphate kinase [Salmonella virus SPC35]            | 0.0     | YP_004306525.1      |
| 26      | 12533 | 1266  | 100.00%  | 117            | membrane lipoprotein [Shigella phage SSP1]                                  | 7.E-24  | YP_009794526.1      |

|    |       |           |         |     |                                                                                |         |                |
|----|-------|-----------|---------|-----|--------------------------------------------------------------------------------|---------|----------------|
|    |       | 7         |         |     |                                                                                |         |                |
| 27 | 12817 | 1326<br>6 | 98.66%  | 149 | hypothetical protein HOT63_gp118 [Salmonella phage S131]                       | 1.E-103 | YP_009805538.1 |
| 28 | 13223 | 1392<br>1 | 99.57%  | 232 | hypothetical protein A318_gp047 [Escherichia phage<br>vB_EcoS_AKfV33]          | 6.E-172 | YP_006382346.1 |
| 29 | 14076 | 1442<br>0 | 95.61%  | 114 | hypothetical protein [Salmonella enterica subsp. enterica serovar<br>Bareilly] | 2.E-75  | EBS4928293.1   |
| 30 | 14531 | 1481<br>5 | 100.00% | 94  | hypothetical protein [Salmonella phage Stp1]                                   | 3.E-61  | ARQ96238.1     |
| 31 | 14812 | 1510<br>8 | 98.98%  | 98  | hypothetical protein HOS12_gp116 [Salmonella phage SP01]                       | 1.E-65  | YP_009792574.1 |
| 32 | 15474 | 1577<br>3 | 100.00% | 99  | hypothetical protein HOS12_gp114 [Salmonella phage SP01]                       | 5.E-65  | YP_009792572.1 |
| 33 | 15766 | 1604<br>7 | 98.92%  | 93  | hypothetical protein HOT55_gp054 [Salmonella phage SP3]                        | 5.E-60  | YP_009804485.1 |
| 34 | 16124 | 1647<br>1 | 100.00% | 115 | hypothetical protein HOR05_gp139 [Escherichia phage<br>phiAPCEc03]             | 3.E-78  | YP_009785205.1 |
| 35 | 16593 | 1688<br>0 | 92.08%  | 101 | hypothetical protein HWD12_gp147 [Phage NBSal003]                              | 5.E-62  | YP_009857107.1 |
| 36 | 16962 | 1733<br>0 | 100.00% | 138 | pyruvate formate-lyase [Salmonella phage Th1]                                  | 6.E-84  | YP_009849735.1 |
| 37 | 17605 | 1781<br>1 | 92.65%  | 68  | hypothetical protein SLUR09_00165 [Escherichia phage slur09]                   | 4.E-38  | YP_009202192.1 |
| 38 | 17811 | 1810<br>4 | 98.97%  | 97  | hypothetical protein HWC42_gp062 [Salmonella phage SE11]                       | 1.E-63  | YP_009848676.1 |
| 39 | 18172 | 1833<br>9 | 100.00% | 55  | hypothetical protein SLUR09_00163 [Escherichia phage slur09]                   | 6.E-31  | YP_009202190.1 |
| 40 | 18449 | 1861<br>3 | 100.00% | 54  | hypothetical protein A318_gp158 [Escherichia phage<br>vB_EcoS_AKfV33]          | 3.E-29  | YP_006382359.1 |
| 41 | 18606 | 1885<br>7 | 100.00% | 83  | hypothetical protein SPC35_0057 [Salmonella virus SPC35]                       | 1.E-54  | YP_004306540.1 |
| 42 | 19125 | 1936<br>1 | 100.00% | 78  | hypothetical protein HOT55_gp004 [Salmonella phage SP3]                        | 5.E-48  | YP_009804435.1 |
| 43 | 19354 | 1955<br>1 | 100.00% | 65  | hypothetical protein HWC42_gp057 [Salmonella phage SE11]                       | 8.E-39  | YP_009848671.1 |
| 44 | 20207 | 2079<br>1 | 99.48%  | 194 | HNH endonuclease [Salmonella phage bux]                                        | 2.E-139 | QIQ61635.1     |
| 45 | 21337 | 2150<br>4 | 100.00% | 55  | hypothetical protein HWC51_gp053 [Salmonella phage Th1]                        | 4.E-32  | YP_009849743.1 |
| 46 | 21694 | 2189<br>1 | 100.00% | 65  | hypothetical protein HOS34_gp010 [Shigella phage SSP1]                         | 2.E-39  | YP_009794677.1 |
| 47 | 22345 | 2269<br>2 | 99.13%  | 115 | hypothetical protein HWC42_gp053 [Salmonella phage SE11]                       | 2.E-76  | YP_009848667.1 |
| 48 | 22796 | 2295      | 98.08%  | 52  | hypothetical protein HOS12_gp103 [Salmonella phage SP01]                       | 1.E-25  | YP_009792561.1 |

|    |       |           |         |     |                                                                       |         |                |
|----|-------|-----------|---------|-----|-----------------------------------------------------------------------|---------|----------------|
|    |       | 4         |         |     |                                                                       |         |                |
| 49 | 23058 | 2324<br>3 | 100.00% | 61  | hypothetical protein SPC35_0061 [Salmonella virus SPC35]              | 6.E-33  | YP_004306544.1 |
| 50 | 23726 | 2399<br>8 | 100.00% | 90  | hypothetical protein SLUR09_00141 [Escherichia phage slur09]          | 9.E-61  | YP_009202180.1 |
| 51 | 24545 | 2482<br>0 | 100.00% | 91  | hypothetical protein [Salmonella phage vB_SenS_PHB06]                 | 4.E-59  | AVQ09915.1     |
| 52 | 24911 | 2511<br>7 | 100.00% | 68  | hypothetical protein [Salmonella phage vB_SenS_PHB06]                 | 3.E-40  | AVQ09914.1     |
| 53 | 25110 | 2527<br>7 | 100.00% | 55  | hypothetical protein SLUR09_00134 [Escherichia phage slur09]          | 4.E-32  | YP_009202177.1 |
| 54 | 25471 | 2565<br>6 | 100.00% | 61  | hypothetical protein A318_gp144 [Escherichia phage<br>vB_EcoS_AKFV33] | 4.E-36  | YP_006382373.1 |
| 55 | 25666 | 2585<br>4 | 100.00% | 62  | hypothetical protein HWD13_gp174 [Phage NBSal005]                     | 4.E-36  | YP_009857264.1 |
| 56 | 26068 | 2658<br>6 | 100.00% | 172 | hypothetical protein SPC35_0067 [Salmonella virus SPC35]              | 1.E-124 | YP_004306550.1 |
| 57 | 26853 | 2784<br>5 | 98.18%  | 330 | hypothetical protein HWD08_gp077 [Salmonella phage L6jm]              | 0.0     | YP_009856473.1 |
| 58 | 27867 | 2828<br>3 | 100.00% | 138 | hypothetical protein HOT54_gp098 [Salmonella phage LVR16A]            | 3.E-87  | YP_009804365.1 |
| 59 | 28607 | 2955<br>4 | 100.00% | 315 | hypothetical protein FG39_gp136 [Escherichia phage<br>vB_EcoS_FFH_1]  | 0.0     | YP_009031698.1 |
| 60 | 30498 | 3093<br>2 | 99.31%  | 144 | hypothetical protein ACSA001_0720 [Salmonella phage<br>vB_SalS_SA001] | 3.E-99  | QKE54223.1     |
| 61 | 30932 | 3110<br>2 | 100.00% | 56  | hypothetical protein HOR86_gp029 [Escherichia phage OSYSP]            | 6.E-31  | YP_009790952.1 |
| 62 | 31171 | 3162<br>0 | 100.00% | 149 | cell wall hydrolase SleB [Escherichia phage vB_EcoS_AKFV33]           | 8.E-107 | YP_006382380.1 |
| 63 | 31626 | 3194<br>3 | 100.00% | 105 | hypothetical protein SPC35_0074 [Salmonella virus SPC35]              | 2.E-71  | YP_004306557.1 |
| 64 | 32386 | 3302<br>4 | 100.00% | 212 | tail fiber protein [Escherichia phage fp01]                           | 1.E-149 | YP_009841416.1 |
| 65 | 33078 | 3326<br>0 | 100.00% | 60  | hypothetical protein SPC35_0076 [Salmonella virus SPC35]              | 7.E-34  | YP_004306559.1 |
| 66 | 33331 | 3403<br>2 | 99.14%  | 233 | metallopeptidase [Salmonella phage SP01]                              | 9.E-175 | YP_009792544.1 |
| 67 | 34061 | 3429<br>7 | 100.00% | 78  | hypothetical protein BI021_gp017 [Salmonella phage NR01]              | 8.E-51  | YP_009283358.1 |
| 68 | 34339 | 3455<br>4 | 100.00% | 71  | hypothetical protein A318_gp131 [Escherichia phage<br>vB_EcoS_AKFV33] | 3.E-41  | YP_006382386.1 |
| 69 | 34619 | 3513<br>4 | 99.42%  | 171 | hypothetical protein SLUR09_00115 [Escherichia phage slur09]          | 5.E-121 | YP_009202161.1 |
| 70 | 35210 | 3565      | 100.00% | 149 | Swarming motility protein YbiA [Escherichia phage slur09]             | 1.E-105 | YP_009202160.1 |

|    |       |       |         |     |                                                                                                 |         |                |
|----|-------|-------|---------|-----|-------------------------------------------------------------------------------------------------|---------|----------------|
|    |       | 9     |         |     |                                                                                                 |         |                |
| 71 | 35656 | 35940 | 100.00% | 94  | hypothetical protein SLUR09_00113 [Escherichia phage slur09]                                    | 4.E-60  | YP_009202159.1 |
| 72 | 36018 | 36494 | 99.37%  | 158 | ribonuclease H [Salmonella virus SPC35]                                                         | 2.E-114 | YP_004306565.1 |
| 73 | 36494 | 36775 | 100.00% | 93  | hypothetical protein FG39_gp122 [Escherichia phage vB_EcoS_FFH_1]                               | 1.E-61  | YP_009031712.1 |
| 74 | 36869 | 37708 | 99.64%  | 279 | thymidylate synthase [Salmonella phage 8sent1748]                                               | 0.0     | QNI21513.1     |
| 75 | 37708 | 38241 | 100.00% | 177 | dihydrofolate reductase [Salmonella phage vB_SenS_PHB06]                                        | 9.E-127 | AVQ09891.1     |
| 76 | 38238 | 39383 | 100.00% | 381 | aerobic ribonucleoside diphosphate reductase, small subunit [Escherichia phage vB_EcoS_FFH_1]   | 0.0     | YP_009031715.1 |
| 77 | 39490 | 41925 | 100.00% | 811 | aerobic ribonucleoside diphosphate reductase, large subunit [Salmonella phage vB_SalS_ABTNLsp9] | 0.0     | QPI13678.1     |
| 78 | 41963 | 42184 | 100.00% | 73  | hypothetical protein A318_gp120 [Escherichia phage vB_EcoS_AKFBV33]                             | 7.E-45  | YP_006382397.1 |
| 79 | 42186 | 42938 | 100.00% | 250 | phosphate starvation-inducible protein [Escherichia phage vB_EcoS_FFH_1]                        | 0.0     | YP_009031719.1 |
| 80 | 43291 | 45165 | 100.00% | 624 | ribonucleotide reductase of class III (anaerobic) large subunit [Salmonella phage vB_Sen_I1]    | 0.0     | QJA17767.1     |
| 81 | 45265 | 45645 | 98.41%  | 126 | hypothetical protein HWB87_gp054 [Escherichia phage fp01]                                       | 1.E-85  | YP_009841433.1 |
| 82 | 45638 | 45844 | 98.53%  | 68  | hypothetical protein SLUR09_00102 [Escherichia phage slur09]                                    | 5.E-39  | YP_009202148.1 |
| 83 | 46027 | 46863 | 98.20%  | 278 | SIR2 family NAD-dependent protein deacetylase [Salmonella phage SE11]                           | 0.0     | YP_009848629.1 |
| 84 | 46850 | 47032 | 100.00% | 60  | hypothetical protein SLUR09_00098 [Escherichia phage slur09]                                    | 2.E-36  | YP_009202144.1 |
| 85 | 47019 | 47525 | 100.00% | 168 | hypothetical protein HWB87_gp058 [Escherichia phage fp01]                                       | 2.E-121 | YP_009841437.1 |
| 86 | 47528 | 47956 | 97.89%  | 142 | hypothetical protein vBStyj51_91 [Salmonella phage vB STyj5-1]                                  | 1.E-97  | QQV89360.1     |
| 87 | 47966 | 48358 | 98.46%  | 130 | hypothetical protein [Salmonella enterica subsp. enterica serovar Derby]                        | 4.E-90  | ECJ4201776.1   |
| 88 | 48351 | 48545 | 96.88%  | 65  | hypothetical protein [Salmonella enterica]                                                      | 1.E-34  | ECP6930370.1   |
| 89 | 48999 | 51938 | 99.59%  | 979 | hypothetical protein HWD13_gp071 [Phage NBSal005]                                               | 0.0     | YP_009857230.1 |
| 90 | 51922 | 52155 | 100.00% | 77  | hypothetical protein SPC35_0100 [Salmonella virus SPC35]                                        | 3.E-48  | YP_004306583.1 |
| 91 | 52224 | 52928 | 100.00% | 234 | hypothetical protein A318_gp104 [Escherichia phage vB_EcoS_AKFBV33]                             | 2.E-170 | YP_006382413.1 |
| 92 | 52921 | 5317  | 97.59%  | 83  | Phage protein [Escherichia phage T5_ev219]                                                      | 5.E-51  | VUF55513.1     |

|     |       |           |         |     |                                                                                           |         |                |
|-----|-------|-----------|---------|-----|-------------------------------------------------------------------------------------------|---------|----------------|
|     |       | 2         |         |     |                                                                                           |         |                |
| 93  | 53276 | 5368<br>6 | 100.00% | 136 | D3 protein [Salmonella virus SPC35]                                                       | 6.E-94  | YP_004306586.1 |
| 94  | 53723 | 5401<br>9 | 100.00% | 98  | hypothetical protein SPC35_0104 [Salmonella virus SPC35]                                  | 3.E-65  | YP_004306587.1 |
| 95  | 54070 | 5437<br>8 | 100.00% | 102 | hypothetical protein SPC35_0105 [Salmonella virus SPC35]                                  | 3.E-69  | YP_004306588.1 |
| 96  | 54465 | 5473<br>7 | 100.00% | 90  | hypothetical protein [Salmonella phage SP1a]                                              | 3.E-59  | ATI18466.1     |
| 97  | 54738 | 5570<br>9 | 99.69%  | 323 | DNA ligase [Salmonella enterica subsp. enterica serovar Bareilly]                         | 0.0     | EBS4928354.1   |
| 98  | 55912 | 5669<br>1 | 98.84%  | 259 | NAD-dependent DNA ligase subunit B [Escherichia phage<br>vB_Eco_mar004NP2]                | 0.0     | YP_009824690.1 |
| 99  | 56684 | 5745<br>1 | 100.00% | 255 | hypothetical protein BI021_gp050 [Salmonella phage NR01]                                  | 0.0     | YP_009283391.1 |
| 100 | 57483 | 5900<br>6 | 100.00% | 507 | putative replicative DNA helicase [Escherichia phage<br>vB_EcoS_AKFV33]                   | 0.0     | YP_006382421.1 |
| 101 | 59003 | 5989<br>3 | 100.00% | 296 | toprim domain-containing protein [Shigella flexneri]                                      | 0.0     | EFQ1274325.1   |
| 102 | 59956 | 6252<br>3 | 100.00% | 855 | DNA polymerase I [Salmonella phage L6jm]                                                  | 0.0     | YP_009856518.1 |
| 103 | 62516 | 6301<br>3 | 100.00% | 165 | hypothetical protein SPC35_0113 [Salmonella virus SPC35]                                  | 3.E-116 | YP_004306596.1 |
| 104 | 63010 | 6436<br>2 | 100.00% | 450 | putative ATP-dependent helicase [Escherichia phage<br>vB_Eco_mar004NP2]                   | 0.0     | YP_009824683.1 |
| 105 | 64362 | 6486<br>7 | 100.00% | 94  | hypothetical protein T5.125 [Escherichia virus T5]                                        | 3.E-61  | YP_006953.1    |
| 106 | 64860 | 6563<br>3 | 99.22%  | 257 | D11 protein [Salmonella phage vB_SalS_ABTNLsp9]                                           | 0.0     | QPI13649.1     |
| 107 | 65671 | 6614<br>7 | 97.47%  | 158 | hypothetical protein SLUR09_00075 [Escherichia phage slur09]                              | 7.E-108 | YP_009202121.1 |
| 108 | 66131 | 6710<br>8 | 99.38%  | 325 | Calcineurin-like phosphoesterase superfamily domain protein<br>[Escherichia phage slur09] | 0.0     | YP_009202120.1 |
| 109 | 67089 | 6892<br>7 | 99.18%  | 612 | hypothetical protein HWD08_gp128 [Salmonella phage L6jm]                                  | 0.0     | YP_009856524.1 |
| 110 | 68931 | 6941<br>3 | 100.00% | 160 | D14 protein [Salmonella virus SPC35]                                                      | 2.E-115 | YP_004306602.1 |
| 111 | 69413 | 7028<br>8 | 100.00% | 291 | flap endonuclease [Escherichia phage vB_EcoS_FFH_1]                                       | 0.0     | YP_009031749.1 |
| 112 | 70285 | 7073<br>1 | 100.00% | 148 | deoxyUTP pyrophosphatase [Salmonella phage SP01]                                          | 5.E-106 | YP_009792498.1 |
| 113 | 70694 | 7095<br>7 | 91.95%  | 87  | hypothetical protein SLUR09_00069 [Escherichia phage slur09]                              | 7.E-53  | YP_009202115.1 |
| 114 | 71048 | 7121      | 90.57%  | 65  | hypothetical protein HOT33_gp075 [Escherichia phage Gostya9]                              | 4.E-05  | YP_009802280.1 |

|     |       |           |         |      |                                                                         |         |                |
|-----|-------|-----------|---------|------|-------------------------------------------------------------------------|---------|----------------|
|     |       | 2         |         |      |                                                                         |         |                |
| 115 | 71200 | 7133<br>4 | 87.88%  | 276  | hypothetical protein SLURMMXVI_140074 [Escherichia phage vB_Eco_SLUR25] | 5.E-11  | SOE45396.1     |
| 116 | 71479 | 7413<br>6 | 77.80%  | 889  | L-shaped tail fiber assembly protein [Escherichia phage Gostya9]        | 0.0     | YP_009802281.1 |
| 117 | 74136 | 7455<br>8 | 100.00% | 140  | hypothetical protein HOS12_gp037 [Salmonella phage SP01]                | 3.E-95  | YP_009792495.1 |
| 118 | 74563 | 7666<br>5 | 99.00%  | 700  | tail fiber protein [Phage NBSal005]                                     | 0.0     | YP_009857205.1 |
| 119 | 76666 | 7951<br>5 | 99.26%  | 949  | putative tail tip protein [Salmonella phage Stp1]                       | 0.0     | ARQ96308.1     |
| 120 | 79512 | 8012<br>6 | 100.00% | 204  | hypothetical protein HWD13_gp044 [Phage NBSal005]                       | 2.E-145 | YP_009857203.1 |
| 121 | 80236 | 8391<br>6 | 99.51%  | 1226 | tail length tape-measure protein [Salmonella phage SP01]                | 0.0     | YP_009792491.1 |
| 122 | 84000 | 8436<br>8 | 100.00% | 122  | hypothetical protein HWD13_gp041 [Phage NBSal005]                       | 3.E-83  | YP_009857200.1 |
| 123 | 84430 | 8483<br>4 | 99.25%  | 134  | hypothetical protein [Salmonella phage 8sent1748]                       | 9.E-93  | QNI21561.1     |
| 124 | 84834 | 8573<br>0 | 99.66%  | 298  | minor tail protein [Escherichia phage Gostya9]                          | 0.0     | YP_009802289.1 |
| 125 | 85735 | 8712<br>6 | 99.14%  | 463  | tail fibers protein [Salmonella phage SP01]                             | 0.0     | YP_009792487.1 |
| 126 | 87153 | 8763<br>8 | 100.00% | 161  | hypothetical protein T5.146 [Escherichia virus T5]                      | 1.E-116 | YP_006974.1    |
| 127 | 87642 | 8840<br>9 | 98.82%  | 255  | hypothetical protein HOS12_gp027 [Salmonella phage SP01]                | 0.0     | YP_009792485.1 |
| 128 | 88409 | 8892<br>1 | 100.00% | 170  | hypothetical protein SPC35_0135 [Salmonella virus SPC35]                | 2.E-123 | YP_004306618.1 |
| 129 | 88981 | 9035<br>7 | 100.00% | 458  | capsid and scaffold protein [Salmonella phage SP01]                     | 0.0     | YP_009792483.1 |
| 130 | 90375 | 9100<br>7 | 100.00% | 210  | prohead protease [Salmonella phage SP3]                                 | 3.E-154 | YP_009804578.1 |
| 131 | 91011 | 9149<br>9 | 98.77%  | 162  | putative tail protein [Salmonella phage SE11]                           | 2.E-110 | YP_009848729.1 |
| 132 | 91496 | 9271<br>3 | 99.75%  | 405  | portal protein [Salmonella phage vB_Sen-E22]                            | 0.0     | QJD49403.1     |
| 133 | 92713 | 9315<br>0 | 100.00% | 145  | hypothetical protein SLUR09_00051 [Escherichia phage slur09]            | 2.E-103 | YP_009202097.1 |
| 134 | 93265 | 9458<br>1 | 99.77%  | 438  | Terminase-like family protein [Escherichia phage slur09]                | 0.0     | YP_009202096.1 |
| 135 | 94581 | 9506<br>3 | 100.00% | 160  | hypothetical protein FG39_gp061 [Escherichia phage vB_EcoS_FFH_1]       | 2.E-113 | YP_009031773.1 |
| 136 | 95074 | 9699      | 95.46%  | 639  | hypothetical protein SLUR09_00048 [Escherichia phage slur09]            | 0.0     | YP_009202094.1 |

|     |        |            |         |     |                                                                          |         |                |
|-----|--------|------------|---------|-----|--------------------------------------------------------------------------|---------|----------------|
|     |        | 3          |         |     |                                                                          |         |                |
| 137 | 97073  | 9730<br>6  | 100.00% | 77  | lytic conversion lipoprotein [Salmonella phage oldekolle]                | 4.E-50  | YP_009857756.1 |
| 138 | 97290  | 9760<br>7  | 80.81%  | 104 | receptor-blocking tail protein [Salmonella phage STWB21]                 | 2.E-50  | QIJ63418.1     |
| 139 | 97683  | 9783<br>8  | 98.04%  | 51  | hypothetical protein HOS12_gp014 [Salmonella phage SP01]                 | 1.E-24  | YP_009792472.1 |
| 140 | 97838  | 9794<br>5  | 100.00% | 35  | hypothetical protein SLUR09_00046 [Escherichia phage slur09]             | 7.E-15  | YP_009202092.1 |
| 141 | 97942  | 9813<br>6  | 100.00% | 64  | membrane protein [Shigella phage SSP1]                                   | 1.E-32  | YP_009794577.1 |
| 142 | 98129  | 9837<br>4  | 96.25%  | 81  | hypothetical protein HWD08_gp158 [Salmonella phage L6jm]                 | 7.E-48  | YP_009856554.1 |
| 143 | 98371  | 9884<br>4  | 98.73%  | 184 | homing endonuclease [Salmonella phage SP01]                              | 1.E-112 | YP_009792470.1 |
| 144 | 99018  | 9975<br>2  | 96.31%  | 258 | deoxynucleoside-5'-monophosphatase [Salmonella virus SPC35]              | 3.E-179 | YP_004306484.1 |
| 145 | 99833  | 1002<br>25 | 99.23%  | 130 | hypothetical protein [Salmonella phage vB_SalS_ABTNLsp9]                 | 6.E-90  | QPI13614.1     |
| 146 | 100293 | 1019<br>63 | 98.56%  | 556 | hypothetical protein HOS12_gp010 [Salmonella phage SP01]                 | 0.0     | YP_009792468.1 |
| 147 | 102061 | 1022<br>58 | 98.46%  | 65  | hypothetical protein HWD13_gp015 [Phage NBSal005]                        | 2.E-37  | YP_009857174.1 |
| 148 | 102316 | 1027<br>23 | 100.00% | 135 | A2 protein [Phage NBSal005]                                              | 9.E-92  | YP_009857173.1 |
| 149 | 102825 | 1030<br>76 | 98.80%  | 83  | hypothetical protein [Salmonella phage vB_SalS_ABTNLsp9]                 | 7.E-52  | QPI13610.1     |
| 150 | 103307 | 1034<br>83 |         |     | No significant similarity found.                                         |         |                |
| 151 | 104697 | 1056<br>89 | 97.88%  | 330 | hypothetical protein [Salmonella enterica subsp. enterica serovar Derby] | 0.0     | ECJ4201720.1   |
| 152 | 105808 | 1060<br>38 | 98.68%  | 76  | hypothetical protein HWC42_gp099 [Salmonella phage SE11]                 | 2.E-48  | YP_009848713.1 |
| 153 | 106088 | 1062<br>37 | 95.92%  | 51  | hypothetical protein HWA82_gp012 [Escherichia phage SP15]                | 2.E-22  | YP_009829660.1 |
| 154 | 106240 | 1064<br>52 | 98.57%  | 70  | hypothetical protein [Salmonella phage SP1a]                             | 4.E-42  | ATI18587.1     |
| 155 | 106576 | 1069<br>20 | 99.12%  | 114 | hypothetical protein [Salmonella phage vB_SalS_ABTNLsp4]                 | 4.E-77  | QPI13147.1     |
